# Supplementary material
Source: MDPI journal article supplement (https://www.mdpi.com/2504-4990/6/4/117)
Supplement: s1 [file s1]

## Supplementary material

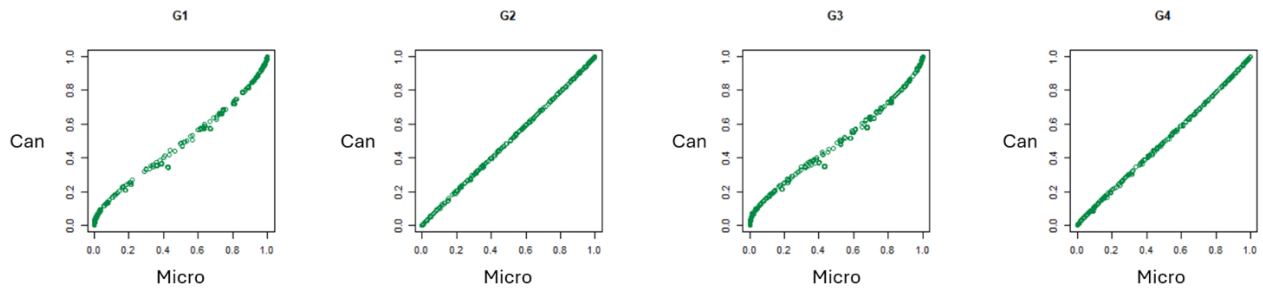

**Figure S1:** Scatterplots of the Monte Carlo simulated  $p$ -value for microcanonical approach (*Micro*) vs. the Monte Carlo simulated  $p$ -value for canonical approach (*Can*).

**Table S1:** The 10 highest species according to the overall ranking for group G1.

| Species                               | ABO | AWO | RBD | RWD | IOBD | IOWD | MM | CM | Score  |
|---------------------------------------|-----|-----|-----|-----|------|------|----|----|--------|
| <i>Bifidobacterium longum</i>         | 1   | 1   | 0   | 0   | 1    | 1    | 1  | 1  | 75.00% |
| <i>Bifidobacterium breve</i>          | 1   | 1   | 0   | 0   | 1    | 1    | 1  | 1  | 75.00% |
| <i>Ruminococcus gnavus</i>            | 1   | 1   | 0   | 0   | 1    | 1    | 1  | 1  | 75.00% |
| <i>Escherichia coli</i>               | 1   | 1   | 0   | 0   | 0    | 1    | 1  | 1  | 62.50% |
| <i>Bifidobacterium bifidum</i>        | 0   | 1   | 0   | 0   | 1    | 1    | 1  | 1  | 62.50% |
| <i>Veillonella parvula</i>            | 0   | 1   | 0   | 0   | 1    | 1    | 1  | 1  | 62.50% |
| <i>Enterococcus faecalis</i>          | 0   | 1   | 0   | 0   | 1    | 1    | 1  | 1  | 62.50% |
| <i>Erysipelatoclostridium ramosum</i> | 0   | 0   | 0   | 0   | 1    | 1    | 1  | 1  | 50.00% |
| <i>Veillonella atypica</i>            | 0   | 0   | 0   | 0   | 1    | 1    | 1  | 1  | 50.00% |
| <i>Haemophilus parainfluenzae</i>     | 0   | 0   | 0   | 0   | 1    | 1    | 1  | 1  | 50.00% |

**Table S2:** The 10 highest species according to the overall ranking for group G2.

| Species                                 | ABO | AWO | RBD | RWD | IOBD | IOWD | MM | CM | Score  |
|-----------------------------------------|-----|-----|-----|-----|------|------|----|----|--------|
| <i>Bacteroides unknown_species</i>      | 1   | 1   | 0   | 0   | 0    | 1    | 1  | 1  | 62.50% |
| <i>Faecalibacterium prausnitzii</i>     | 1   | 1   | 0   | 0   | 0    | 1    | 1  | 1  | 62.50% |
| <i>Faecalibacterium unknown_species</i> | 1   | 1   | 0   | 0   | 0    | 1    | 1  | 1  | 62.50% |
| <i>Ruminococcus unknown_species</i>     | 1   | 1   | 0   | 0   | 0    | 1    | 1  | 1  | 62.50% |

|                                 |   |   |   |   |   |   |   |   |        |
|---------------------------------|---|---|---|---|---|---|---|---|--------|
| Bacteroides uniformis           | 1 | 1 | 0 | 0 | 0 | 1 | 1 | 1 | 62.50% |
| Eubacterium rectale             | 1 | 1 | 0 | 0 | 0 | 1 | 1 | 1 | 62.50% |
| Phocaeicola vulgatus            | 1 | 1 | 0 | 0 | 0 | 1 | 1 | 1 | 62.50% |
| Blautia unknown_species         | 1 | 1 | 0 | 0 | 0 | 0 | 1 | 1 | 50.00% |
| Parabacteroides unknown_species | 1 | 0 | 0 | 0 | 1 | 0 | 1 | 1 | 50.00% |
| Gemmiger unknown species        | 1 | 0 | 0 | 0 | 1 | 0 | 1 | 1 | 50.00% |

**Table S3:** The 10 highest species according to the overall ranking for group G3.

| Species                          | ABO | AWO | RBD | RWD | IOBD | IOWD | MM | CM | Score |
|----------------------------------|-----|-----|-----|-----|------|------|----|----|-------|
| Faecalibacterium prausnitzii     | 1   | 1   | 0   | 0   | 1    | 1    | 1  | 1  | 75%   |
| Faecalibacterium unknown_species | 1   | 1   | 0   | 0   | 1    | 1    | 1  | 1  | 75%   |
| Eubacterium rectale              | 1   | 1   | 0   | 0   | 1    | 1    | 1  | 1  | 75%   |
| Eubacterium unknown_species      | 1   | 1   | 0   | 0   | 1    | 1    | 1  | 1  | 75%   |
| Roseburia unknown_species        | 1   | 1   | 0   | 0   | 1    | 1    | 1  | 1  | 75%   |
| Roseburia inulinivorans          | 1   | 1   | 0   | 0   | 1    | 1    | 1  | 1  | 75%   |
| Blautia unknown_species          | 1   | 1   | 0   | 0   | 0    | 1    | 1  | 1  | 63%   |
| Ruminococcus unknown_species     | 1   | 1   | 0   | 0   | 0    | 1    | 1  | 1  | 63%   |
| Lachnospira unknown_species      | 1   | 0   | 0   | 0   | 1    | 1    | 1  | 1  | 63%   |
| Gemmiger unknown_species         | 1   | 0   | 0   | 0   | 1    | 1    | 1  | 1  | 63%   |

**Table S4:** The 10 highest species according to the overall ranking for group G4.

| Species                          | ABO | AWO | RBD | RWD | IOBD | IOWD | MM | CM | Score |
|----------------------------------|-----|-----|-----|-----|------|------|----|----|-------|
| Intestinimonas unknown_species   | 1   | 0   | 0   | 0   | 1    | 1    | 1  | 1  | 63%   |
| Faecalibacterium prausnitzii     | 1   | 1   | 0   | 0   | 0    | 1    | 1  | 1  | 63%   |
| Faecalibacterium unknown_species | 1   | 1   | 0   | 0   | 0    | 1    | 1  | 1  | 63%   |
| Ruminococcus unknown_species     | 1   | 1   | 0   | 0   | 0    | 1    | 1  | 1  | 63%   |
| Bacteroides uniformis            | 1   | 1   | 0   | 0   | 0    | 1    | 1  | 1  | 63%   |
| Gemmiger unknown_species         | 1   | 0   | 0   | 0   | 1    | 1    | 1  | 1  | 63%   |

|                                 |   |   |   |   |   |   |   |   |     |
|---------------------------------|---|---|---|---|---|---|---|---|-----|
| Blautia unknown_species         | 1 | 1 | 0 | 0 | 0 | 0 | 1 | 1 | 50% |
| Agathobaculum butyriciproducens | 1 | 0 | 0 | 0 | 1 | 0 | 1 | 1 | 50% |
| Eubacterium rectale             | 1 | 1 | 0 | 0 | 0 | 0 | 1 | 1 | 50% |
| Eubacterium unknown_species     | 1 | 0 | 0 | 0 | 0 | 1 | 1 | 1 | 50% |
